# Supplementary material for: 2D BN-biphenylene: structure stability and properties tenability from a DFT perspective
Source: Royal Society of Chemistry journal article supplement (doi:10.1039/d3cp00776f), 2023-01-01
Supplement: d3cp00776f1.pdf [file d3cp00776f1.pdf]

## 2D BN-Biphenylene: Structure Stability and Properties Tunability with DFT Perspective

Mukesh Singh<sup>a</sup>, Brahmananda Chakraborty<sup>b,c\*</sup>

<sup>a</sup>Department of Physics, Indian Institute of Technology Bombay, Powai, Mumbai 400076, India

<sup>b</sup>High Pressure and Synchrotron Radiation Physics Division, Bhabha Atomic Research Centre, Trombay, Mumbai, India

<sup>c</sup>Homi Bhabha National Institute, Mumbai, India

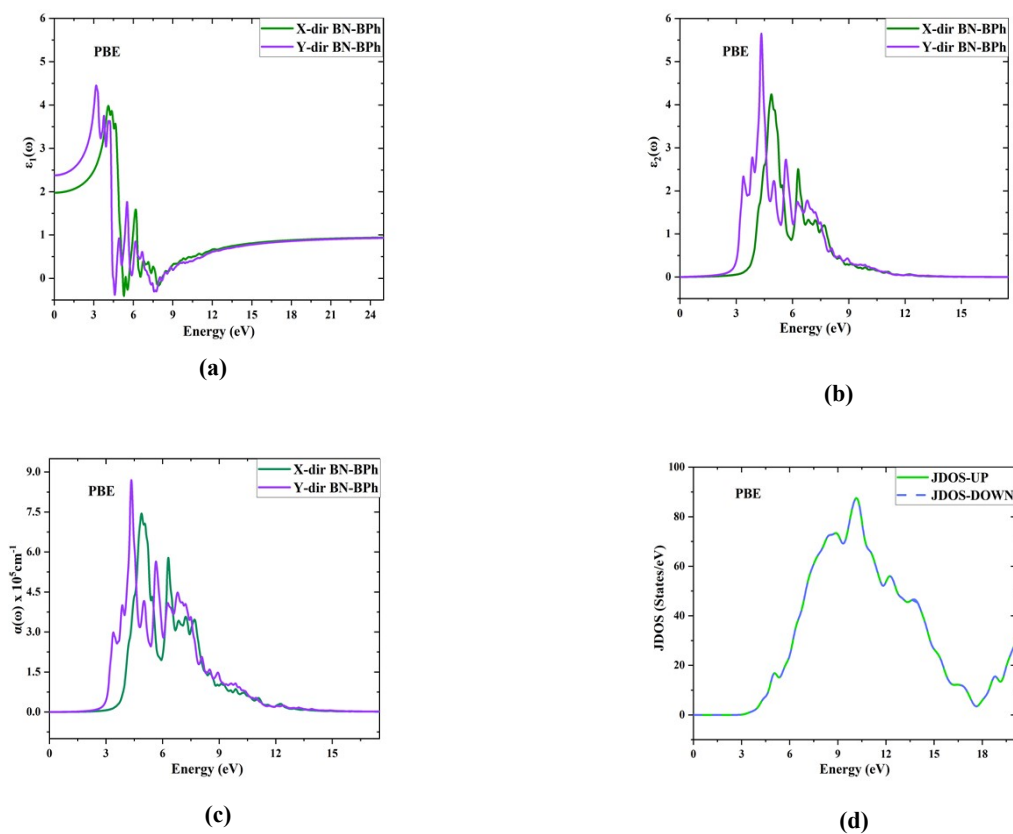

**Fig. S1:** Optical properties of BN-BPh sheet with PBE functional: (a) real part of dielectric constant, (b) imaginary part of dielectric constant, (c) absorption coefficient (d) Joint density of states.

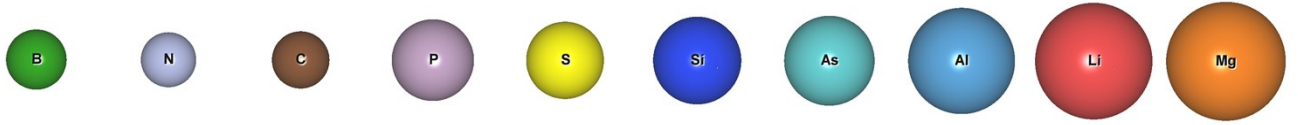

1.  $\text{LiB}_5\text{N}_6$

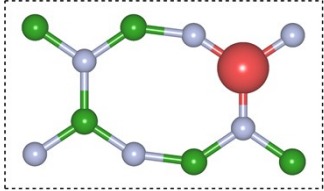

2.  $\text{CB}_5\text{N}_6$

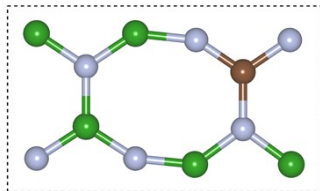

3.  $\text{MgB}_5\text{N}_6$

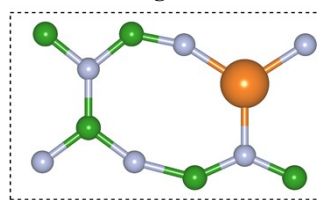

4.  $\text{AlB}_5\text{N}_6$

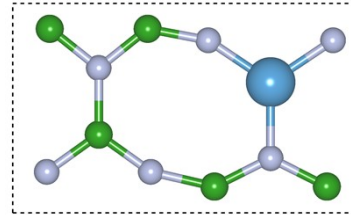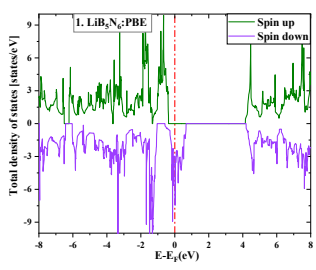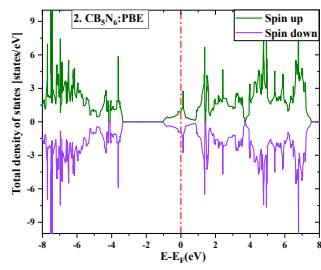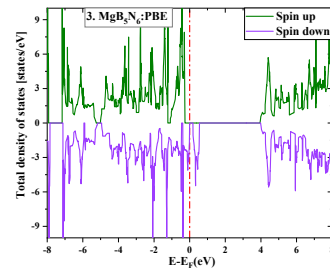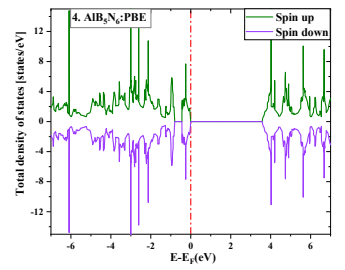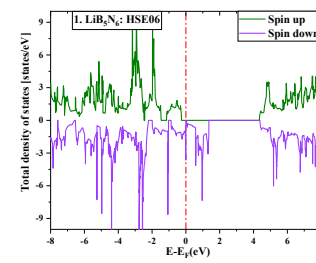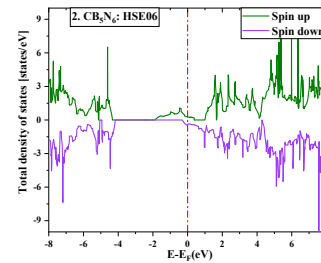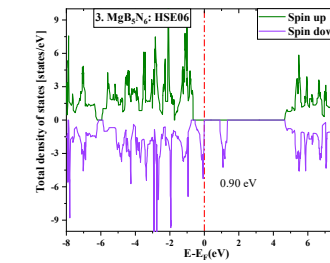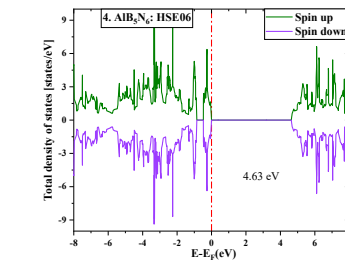

5.  $\text{SiB}_5\text{N}_6$

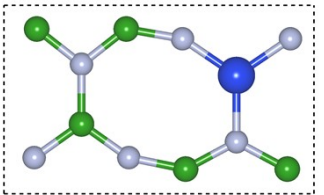

6.  $\text{PB}_5\text{N}_6$

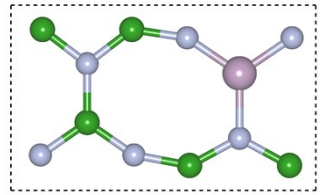

7.  $\text{SB}_5\text{N}_6$

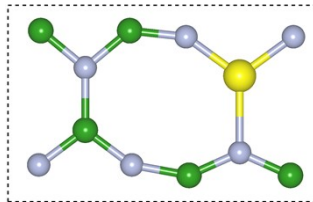

8.  $\text{AsB}_5\text{N}_6$

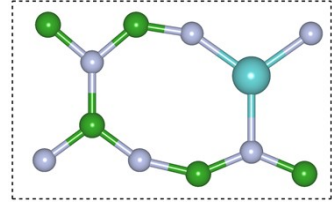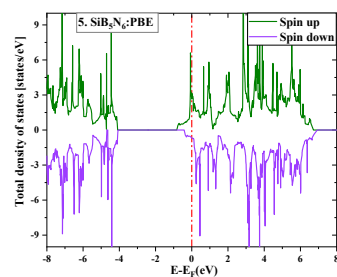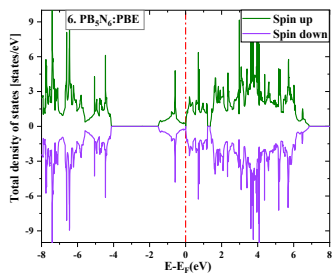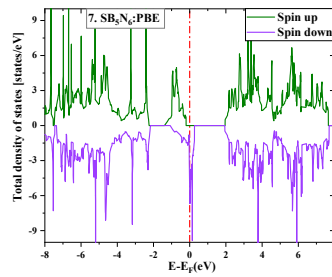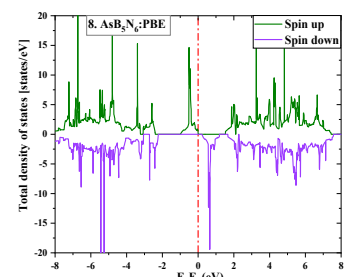

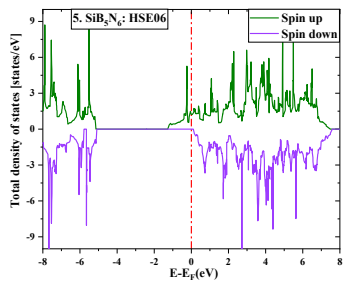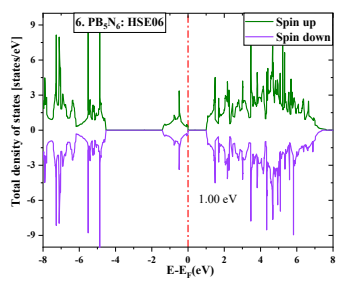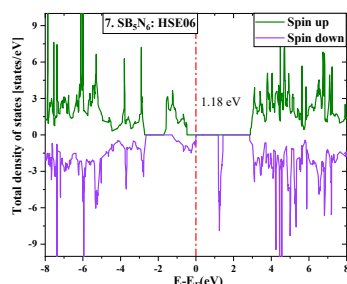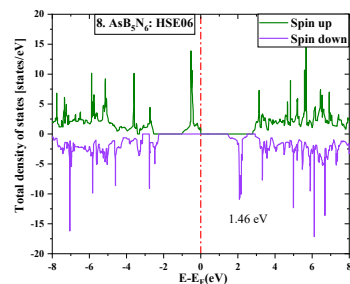

9.  $B_6N_5Li$

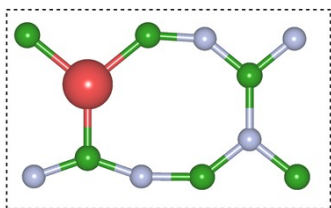

10.  $B_6N_5C$

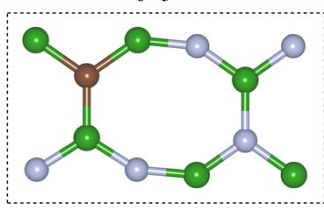

11.  $B_6N_5Mg$

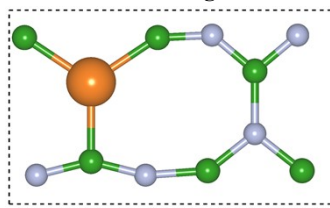

12.  $B_6N_5Al$

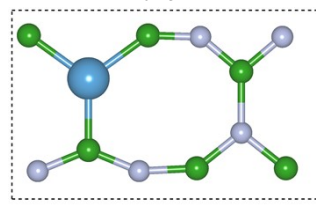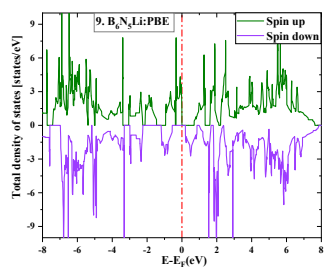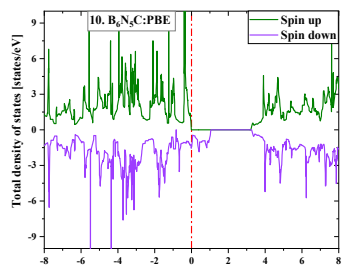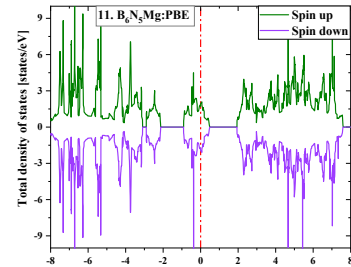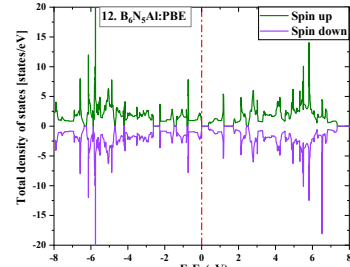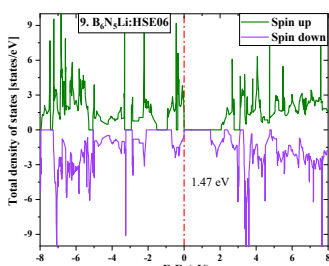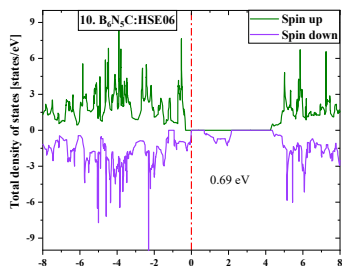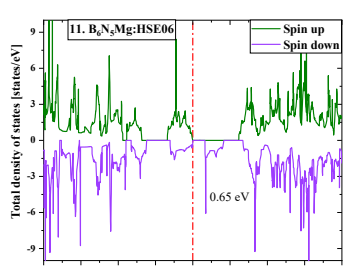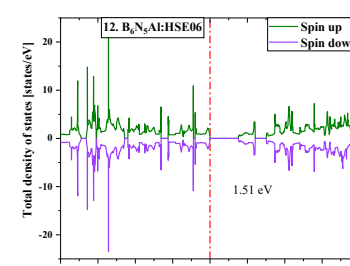

13.  $B_6N_5Si$

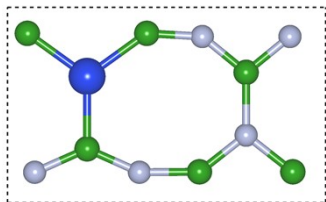

14.  $B_6N_5P$

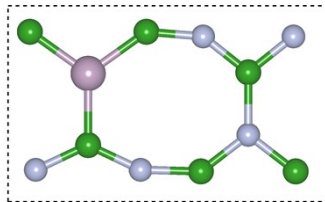

15.  $B_6N_5S$

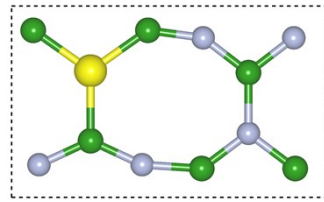

16.  $B_6N_5As$

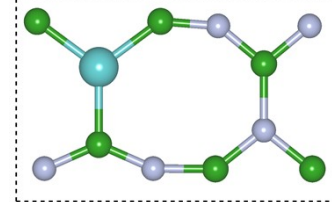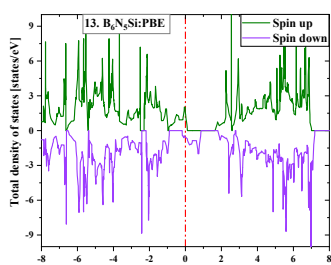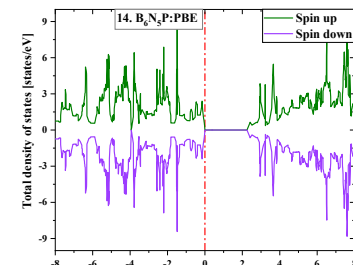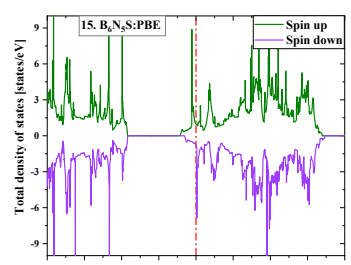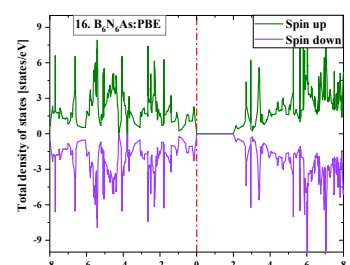

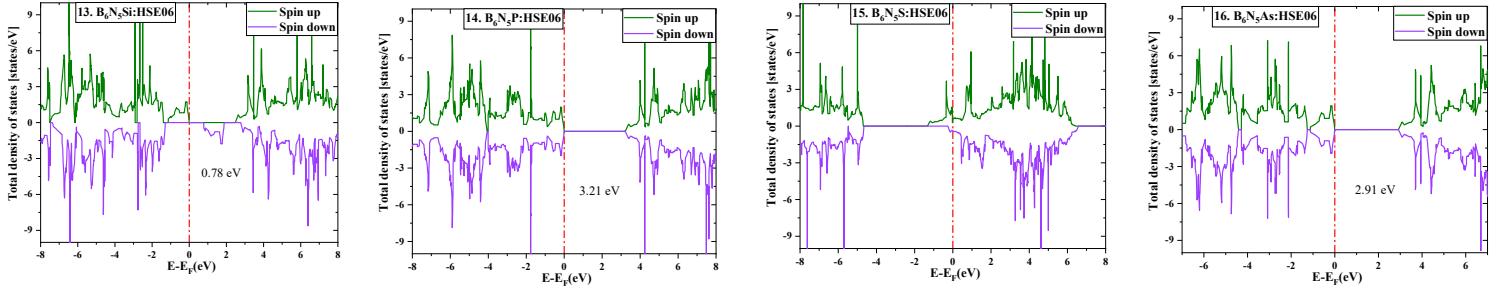

**Fig. S2:** Geometrically optimized unit cell of Li, C, Mg, Al, Si, P, S, As atom substitute to B and N atom in BN-BPh unit cell along their electronic structure. Below the optimized structure of external atom substituted unit cell, its total density of states with PBE and HSE06 functional are plotted in first and second row. We have used notations: 1. legend for atoms with elements name on their spheres are shown 2. N.name-of-unit-cell, N.name-of-unit-cell:PBE and N.name-of-unit-cell:HSE06 represents the structure-name, DOS with PBE and DOS with HSE06, where N serial number of a structure.

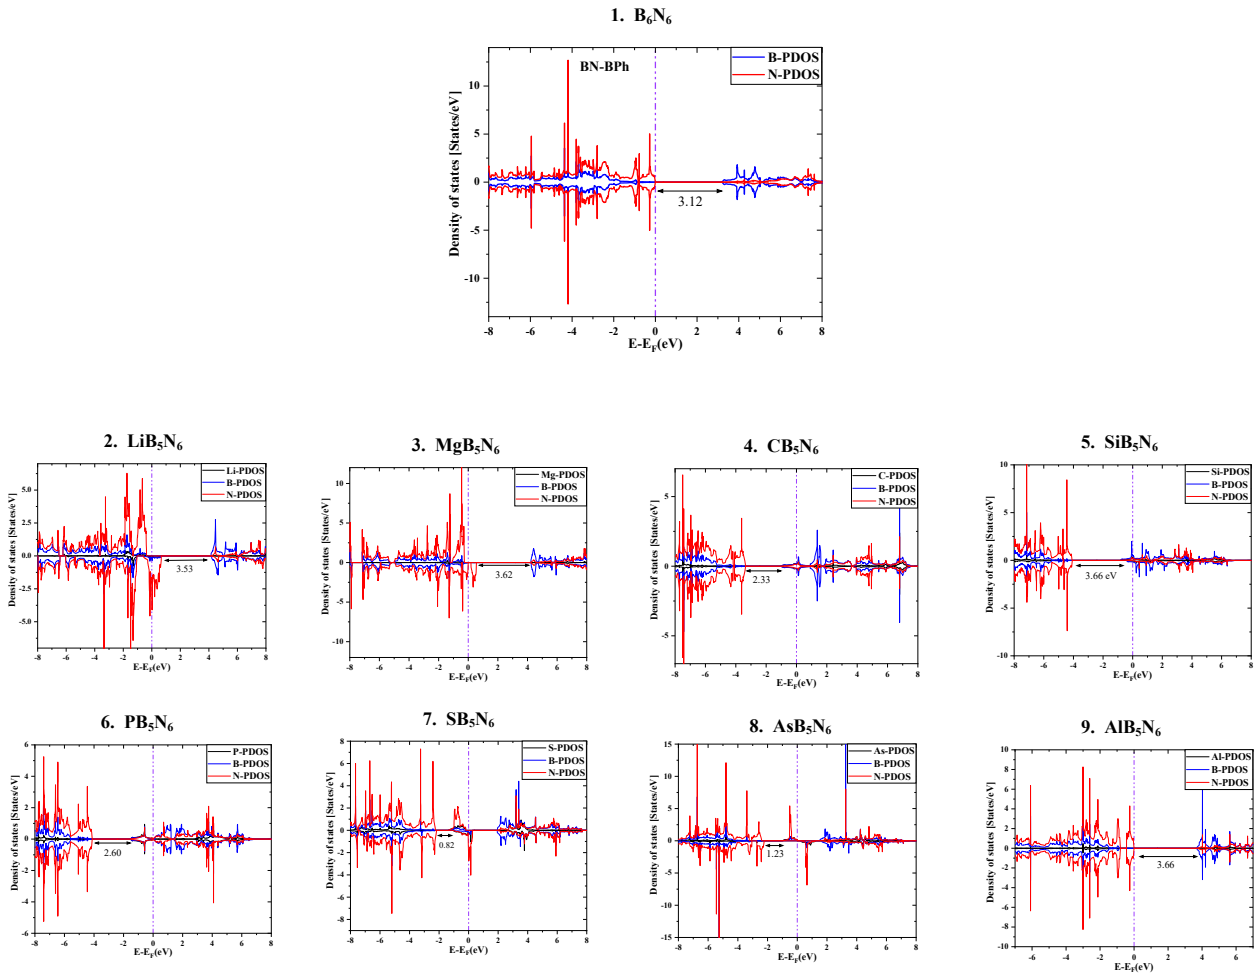

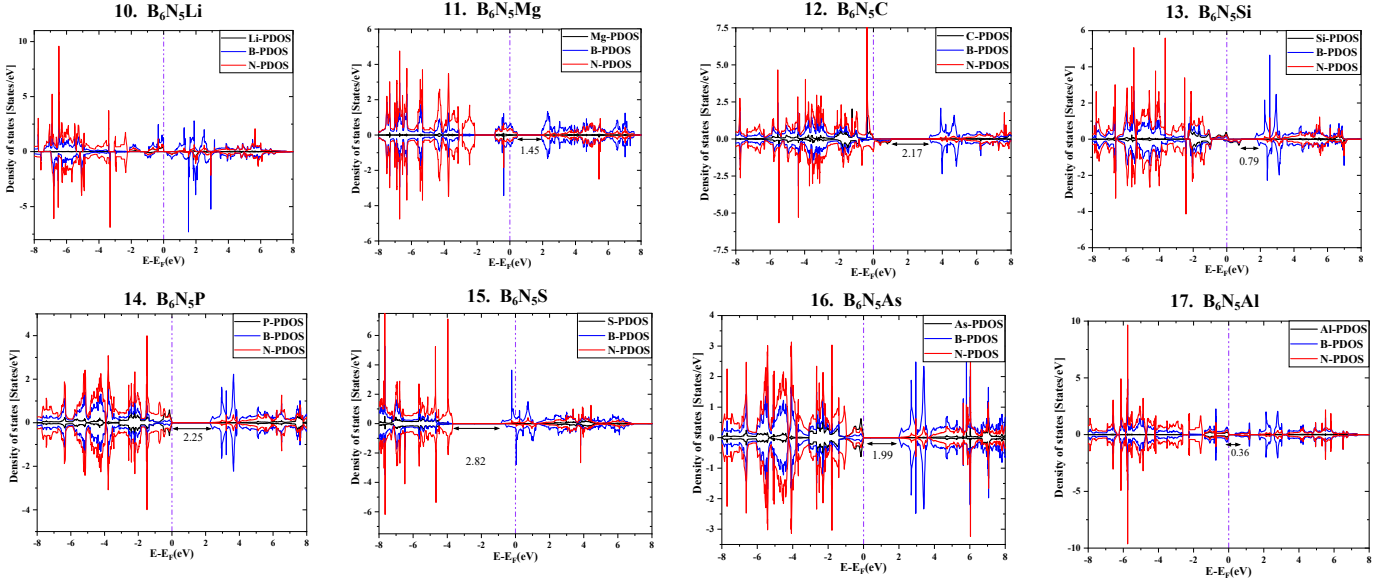

**Fig. S3:** Partial density of states (PDOS) of atoms, B, N and X in X-doped BN-BPh. Where X are Li, Mg, C, Si, P, S, As and Al substituted to B and N atom of BN-BPh sheet. The X substituted to B and N atom of BN-BPh are plotted in first and second column.

**Table S1: Optimized structure of BN-BPh:**

```

Unit_cell:B6N6
1.0000000000000000
 7.6580370324993998  -0.0000000000000000  0.0000000000000000
-0.0000000000000000  4.5530028432465341  0.0000000000000000
 0.0000000000000000  0.0000000000000000  15.0000000000000000
  B      N
  6      6
Direct
0.7500000000000000  0.6421894712788402  0.5000000000000000
0.2500000000000000  0.3578105287211599  0.5000000000000000
0.4051488445350434  0.8580607942538511  0.5000000000000000
0.9051488445350425  0.1419392057461483  0.5000000000000000
0.0948511554649570  0.8580607942538511  0.5000000000000000
0.5948511554649575  0.1419392057461483  0.5000000000000000
0.2500000000000000  0.6792660726147466  0.5000000000000000
0.7500000000000000  0.3207339273852544  0.5000000000000000
0.9060261380288906  0.8169439333960340  0.5000000000000000
0.4060261380288901  0.1830560666039664  0.5000000000000000
0.5939738619711094  0.8169439333960340  0.5000000000000000
0.0939738619711095  0.1830560666039665  0.5000000000000000

```

**Table S2:** Irreducible representation (ir-label) of modes of BN-BPh system

| S.N. | Frequency (cm <sup>-1</sup> ) | ir-label |
|------|-------------------------------|----------|
| 1    | 87.962                        | Au       |
| 2    | 135.099                       | B3g      |
| 3    | 237.882                       | B1g      |
| 4    | 252.617                       | B3g      |
| 5    | 279.402                       | B2u      |
| 6    | 440.635                       | Ag       |
| 7    | 477.803                       | B2g      |
| 8    | 515.993                       | B3u      |
| 9    | 535.478                       | B1g      |
| 10   | 574.160                       | B3g      |
| 11   | 617.088                       | B2u      |
| 12   | 693.082                       | B3g      |
| 13   | 695.575                       | Au       |
| 14   | 738.721                       | B2g      |
| 15   | 750.018                       | B1u      |
| 16   | 757.821                       | B2u      |
| 17   | 823.519                       | Ag       |
| 18   | 827.790                       | B2g      |
| 19   | 892.812                       | B3u      |
| 20   | 935.706                       | B2g      |
| 21   | 956.189                       | B1u      |
| 22   | 968.554                       | Ag       |
| 23   | 1,097.046                     | B3u      |
| 24   | 1,186.030                     | Ag       |
| 25   | 1,194.250                     | B3u      |
| 26   | 1,210.190                     | B1u      |
| 27   | 1,281.595                     | B1u      |
| 28   | 1,300.575                     | Ag       |
| 29   | 1,310.804                     | B3u      |
| 30   | 1,409.426                     | B2g      |
| 31   | 1,451.775                     | Ag       |
| 32   | 1,474.385                     | B2g      |
| 33   | 1,495.340                     | B1u      |

**Table S3:** Intensity peak table of Infrared and Raman spectrum for BN-BPh.

| S.N. | Frequency (cm <sup>-1</sup> ) | IR-intensity | Raman-intensity |
|------|-------------------------------|--------------|-----------------|
| 1    | 87.962                        | 0.000        | 0.000           |
| 2    | 135.099                       | 0.000        | 0.348           |
| 3    | 237.882                       | 0.000        | 0.058           |
| 4    | 252.617                       | 0.000        | 0.488           |
| 5    | 279.402                       | 0.000        | 0.000           |
| 6    | 440.635                       | 0.000        | 8.225           |
| 7    | 477.803                       | 0.000        | 0.358           |
| 8    | 515.993                       | 0.012        | 0.000           |
| 9    | 535.478                       | 0.000        | 0.060           |
| 10   | 574.160                       | 0.000        | 0.526           |
| 11   | 617.088                       | 0.002        | 0.000           |
| 12   | 693.082                       | 0.000        | 0.999           |
| 13   | 695.575                       | 0.000        | 0.000           |
| 14   | 738.721                       | 0.000        | 1.555           |
| 15   | 750.018                       | 0.052        | 0.000           |
| 16   | 757.821                       | 0.112        | 0.000           |
| 17   | 823.519                       | 0.000        | 8.569           |
| 18   | 827.790                       | 0.000        | 1.079           |
| 19   | 892.812                       | 0.015        | 0.000           |
| 20   | 935.706                       | 0.000        | 35.439          |
| 21   | 956.189                       | 0.435        | 0.000           |
| 22   | 968.554                       | 0.000        | 356.219         |
| 23   | 1,097.046                     | 0.013        | 0.000           |
| 24   | 1,186.030                     | 0.000        | 240.933         |
| 25   | 1,194.250                     | 0.085        | 0.000           |
| 26   | 1,210.190                     | 0.001        | 0.000           |
| 27   | 1,281.595                     | 6.352        | 0.000           |
| 28   | 1,300.575                     | 0.000        | 34.108          |
| 29   | 1,310.804                     | 11.091       | 0.000           |
| 30   | 1,409.426                     | 0.000        | 18.395          |
| 31   | 1,451.775                     | 0.000        | 352.911         |
| 32   | 1,474.385                     | 0.000        | 72.122          |
| 33   | 1,495.340                     | 0.303        | 0.000           |

**Table S4:** Comparison of Bandtunning with doping of 8.33% and 4.16% by replacing B/N with external atoms (X) where X are C, Li, Mg, P, S, Si, Al and As.

| S.N. | X  | System<br>[B-->X in BN-BPh]               |                                           | System<br>[N-->X in BN-BPh]            |                                        |
|------|----|-------------------------------------------|-------------------------------------------|----------------------------------------|----------------------------------------|
|      |    | Bandgap<br>(PBE)<br>with 8.33 %<br>doping | Bandgap<br>(PBE)<br>with 4.16 %<br>doping | Bandgap (PBE)<br>with 8.33 %<br>doping | Bandgap (PBE)<br>with 4.16 %<br>doping |
| 1.   | Li | semi-metal                                | semi-metal                                | 0.19                                   | 0.16                                   |
| 2.   | C  | metal                                     | 0.78                                      | semimetal                              | Defect at 0.5 eV                       |
| 3.   | Mg | semi-metal                                | semi-metal                                | metal                                  | 0.39                                   |
| 4.   | Al | 3.57                                      | 3.24                                      | 0.37                                   | 0.37                                   |
| 5.   | Si | metal                                     | metal                                     | metal                                  | Defect at 0.45 eV                      |
| 6.   | P  | metal                                     | 1.03                                      | 2.25                                   | 2.10                                   |
| 7.   | S  | semi-metal                                | semi-metal                                | metal                                  | metal                                  |
| 8.   | As | 0.21                                      | 0.58                                      | 1.99                                   | 2.45                                   |
